# Supplementary material for: A dicyanoisophorone-based fluorescent probe for hypochlorite with a fast response and its applications in bioimaging
Source: Royal Society of Chemistry journal article supplement (doi:10.1039/d2ay00524g), 2022-01-01
Supplement: d2ay00524g1.pdf [file d2ay00524g1.pdf]

Supporting information for

# **A Dicyanisophorone-Based Fluorescent Probe for Hypochlorite with a Fast Response and Its Applications in Bioimaging**

Chenming Chan<sup>a</sup>, Jia Li<sup>a</sup>, Zhaoli Xue<sup>a,\*</sup>, and Binbin Guan<sup>b,\*</sup>

<sup>a</sup>*School of Chemistry and Chemical Engineering, Jiangsu University, Zhenjiang 212013, PR China*

<sup>b</sup>*Nantong Food and Drug Supervision and Inspection Center, Nantong 226400, PR China*

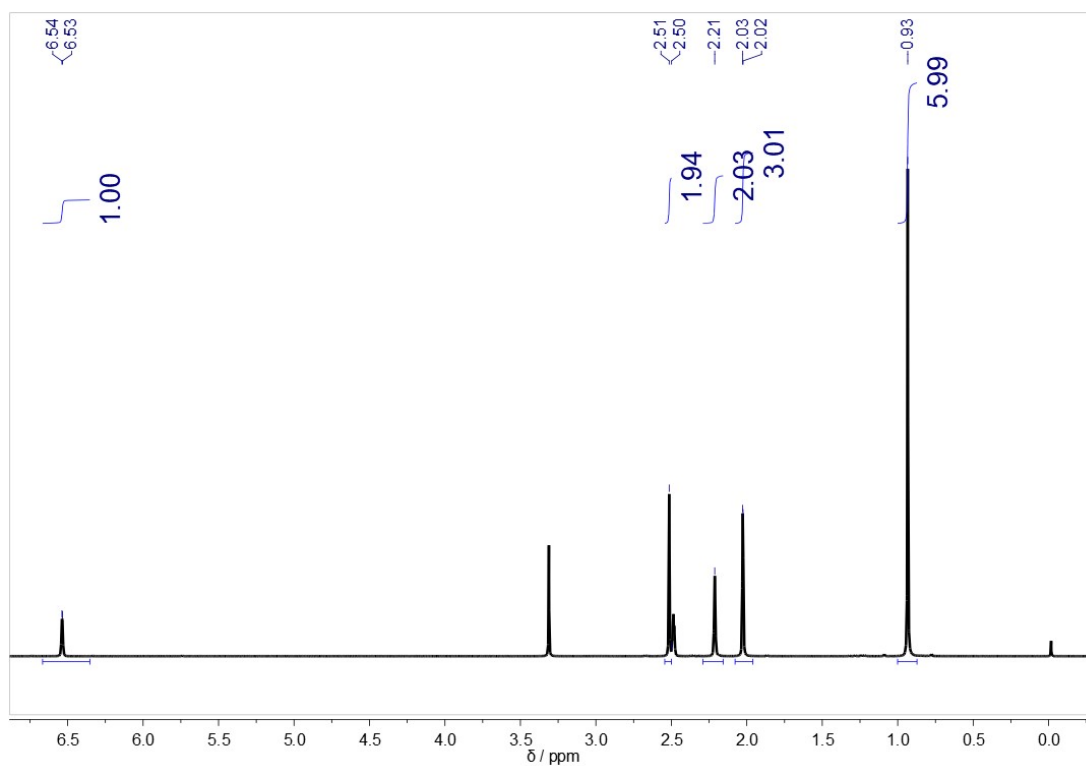

**Figure S1.**  $^1\text{H}$  NMR (400 MHz,  $\text{DMSO-d}_6$ ) spectrum of compound **1**

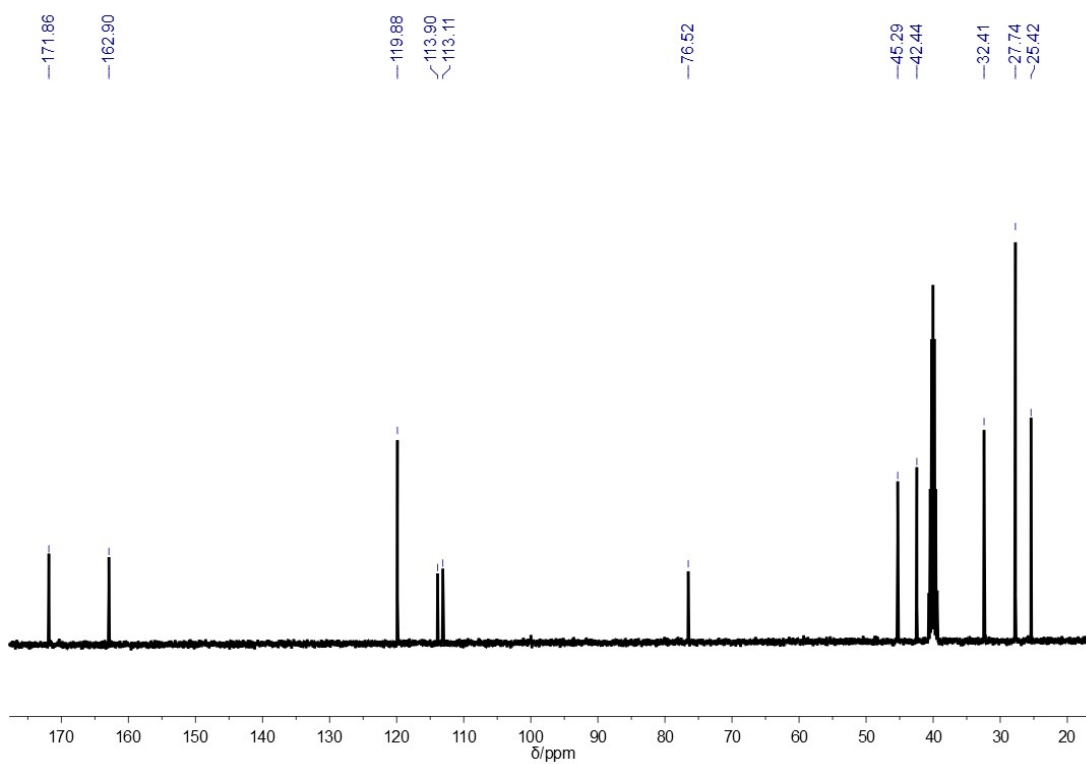

**Figure S2.**  $^{13}\text{C}$  NMR (400 MHz,  $\text{DMSO-d}_6$ ) spectrum of compound **1**

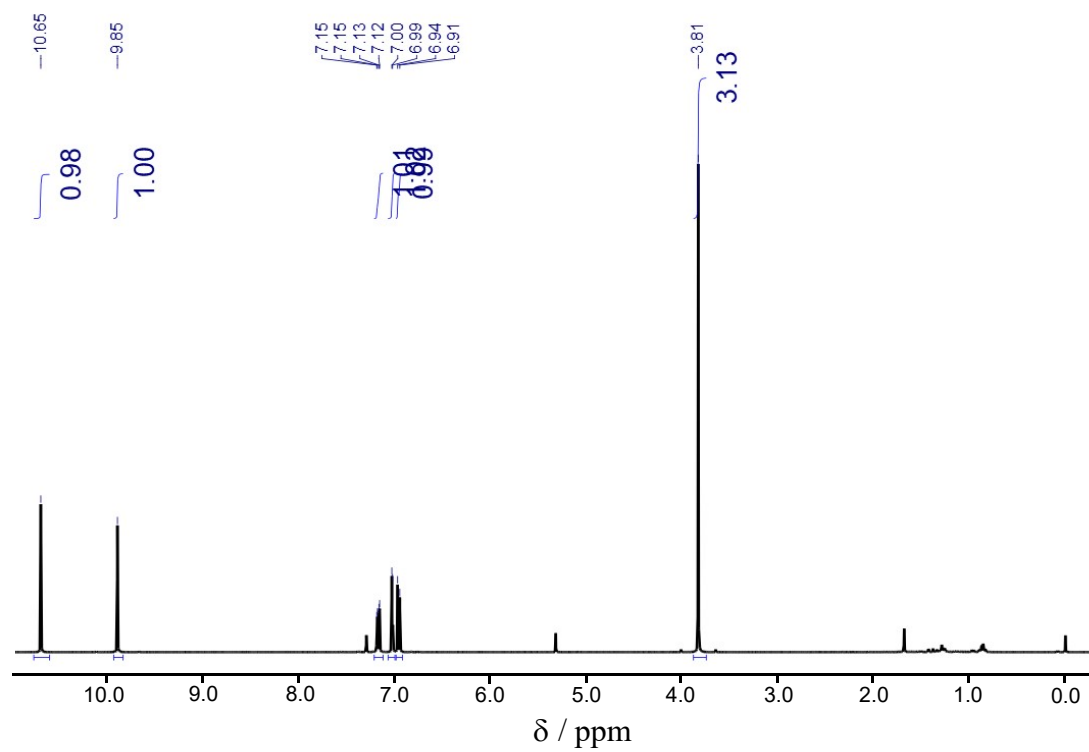

**Figure S3.** <sup>1</sup>H NMR (400 MHz, CDCl<sub>3</sub>) spectrum of compound **2**.

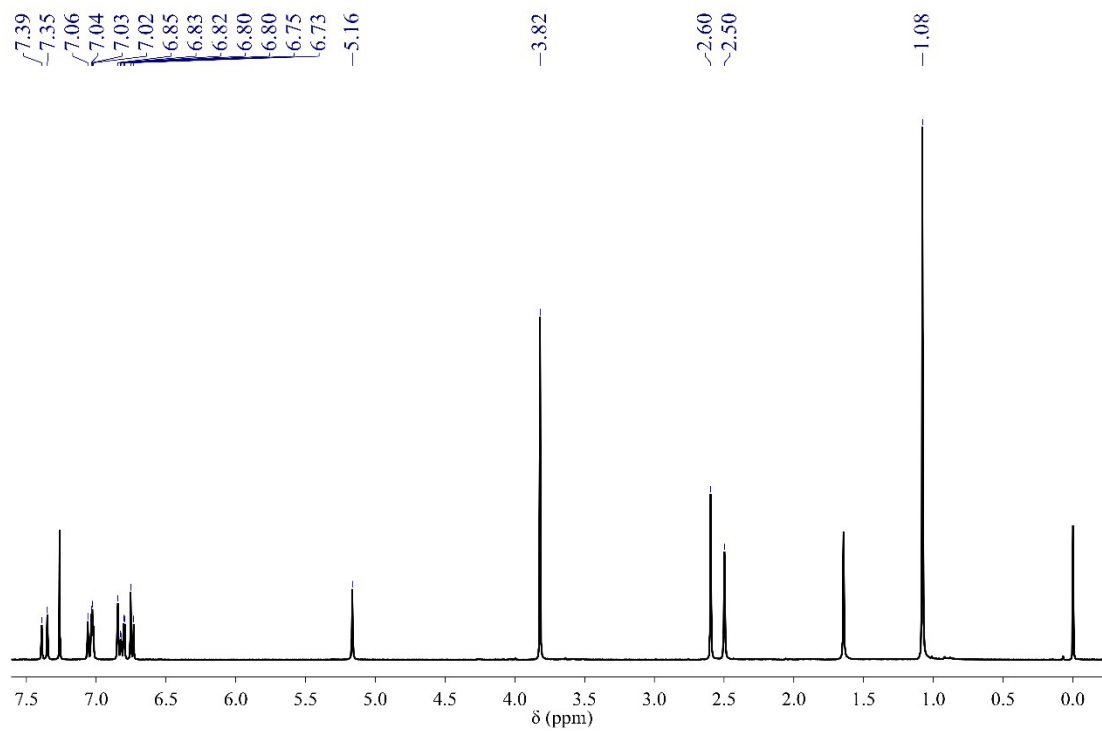

**Figure S4.**  $^1\text{H}$  NMR (400 MHz,  $\text{CDCl}_3$ ) spectrum of compound **Is-OL**.

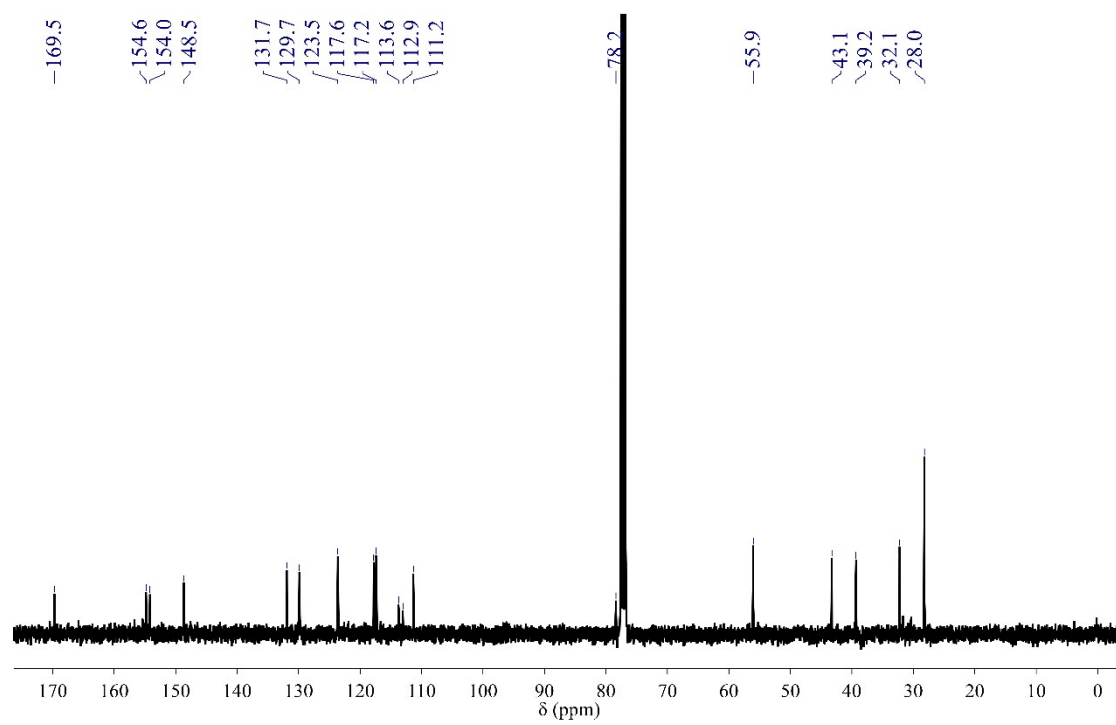

**Figure S5.**  $^{13}\text{C}$  NMR (100 MHz,  $\text{CDCl}_3$ ) spectrum of compound **Is-OL**

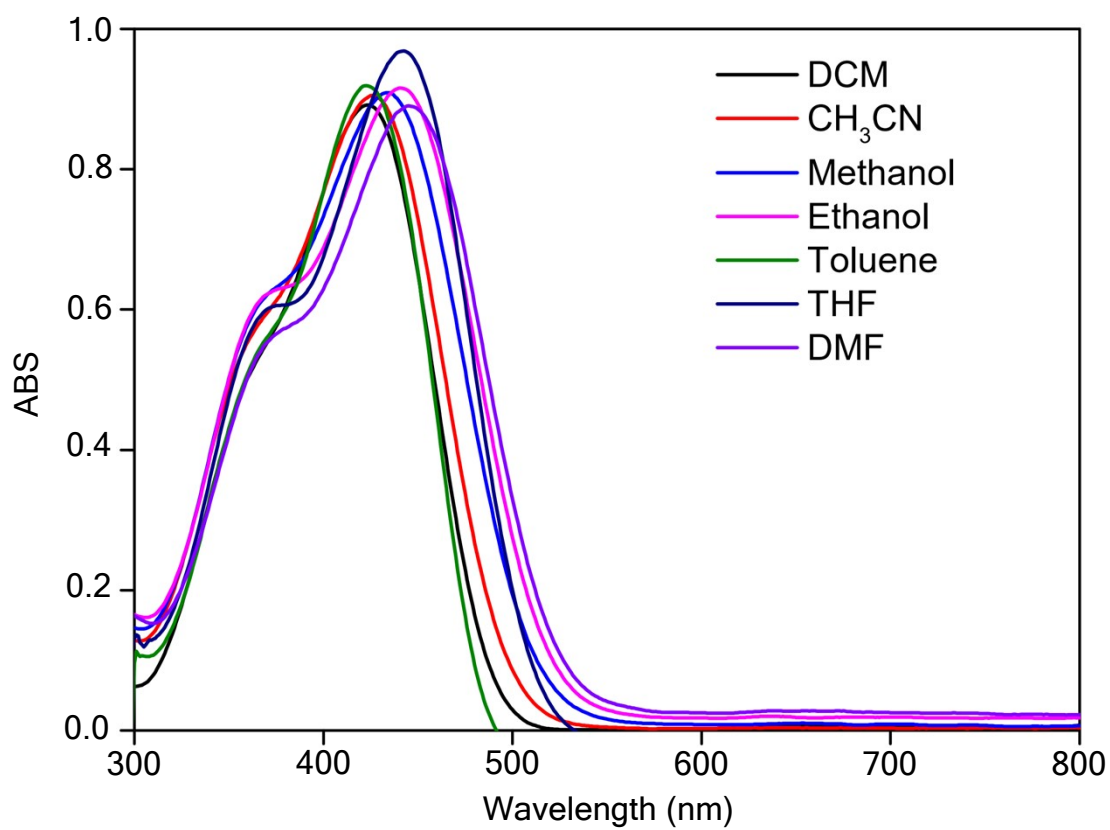

**Figure S6.** The absorption spectra of chemosensor **Is-OL** in different solvents.

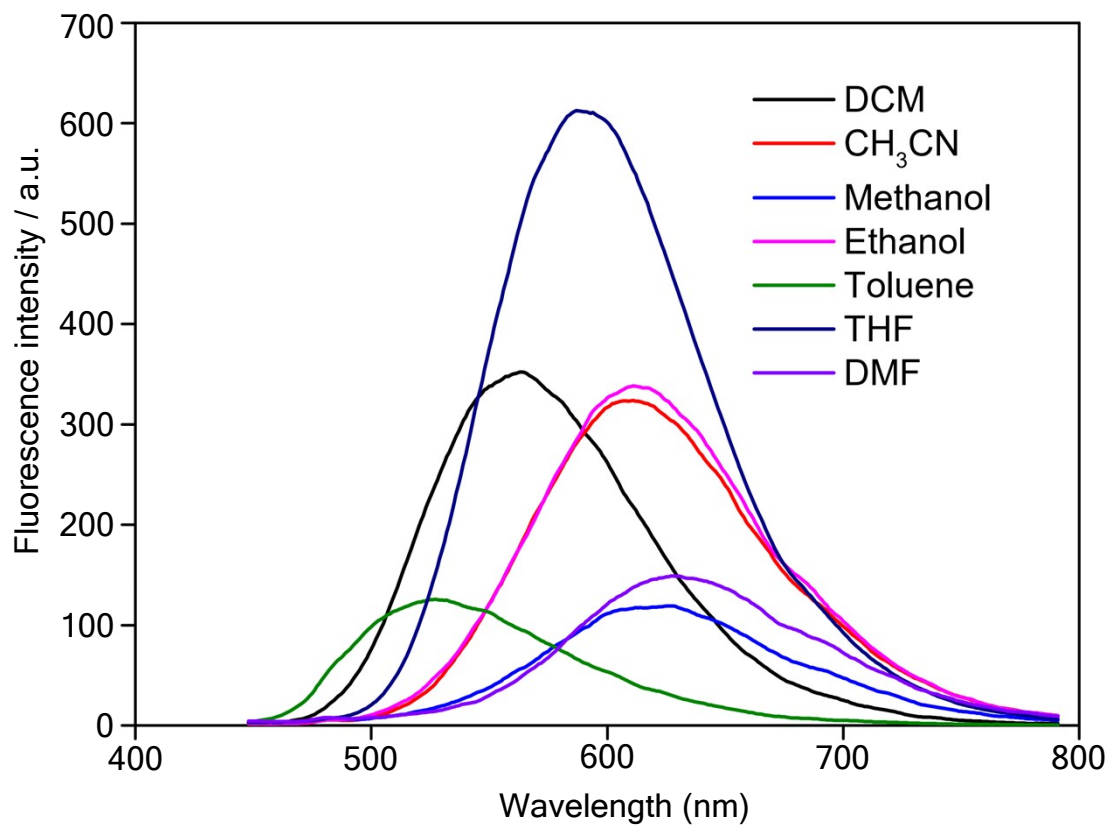

**Figure S7.** Fluorescence intensity spectra of chemosensor **Is-OL** in different solvents.

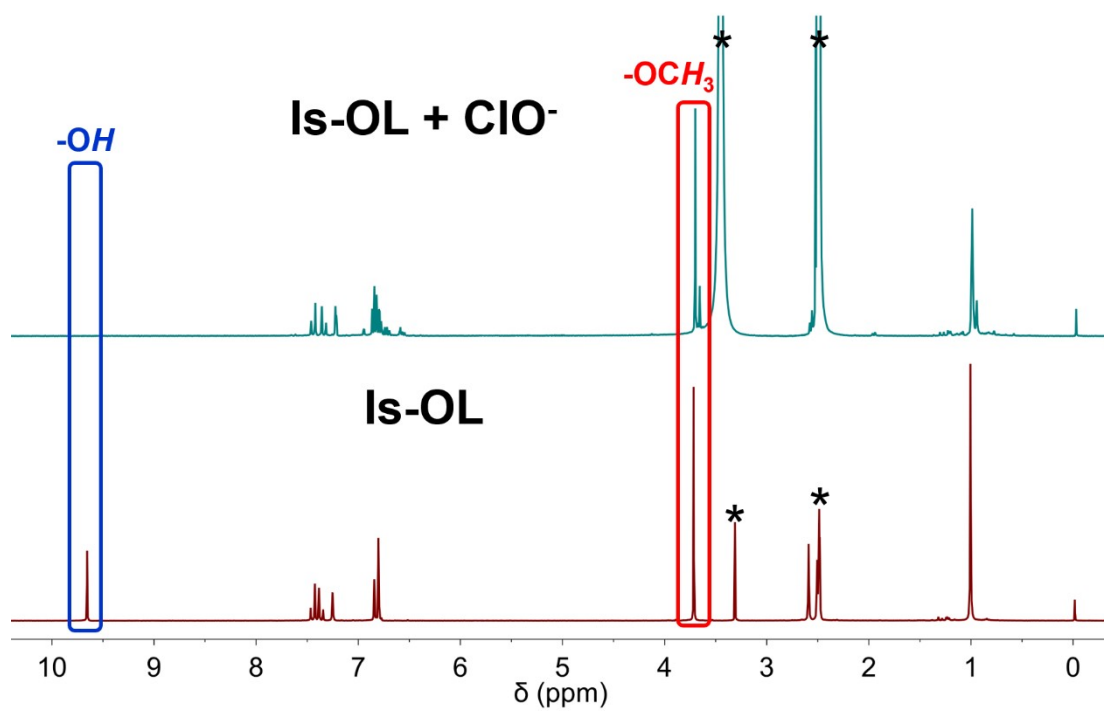

**Figure S8.** <sup>1</sup>H NMR titration spectra of chemosensor **Is-OL** in *d*<sub>6</sub>-DMSO before (bottom) and after the addition 1.0 *equiv.* of ClO<sup>-</sup> (top). \* indicates the solvent peaks.



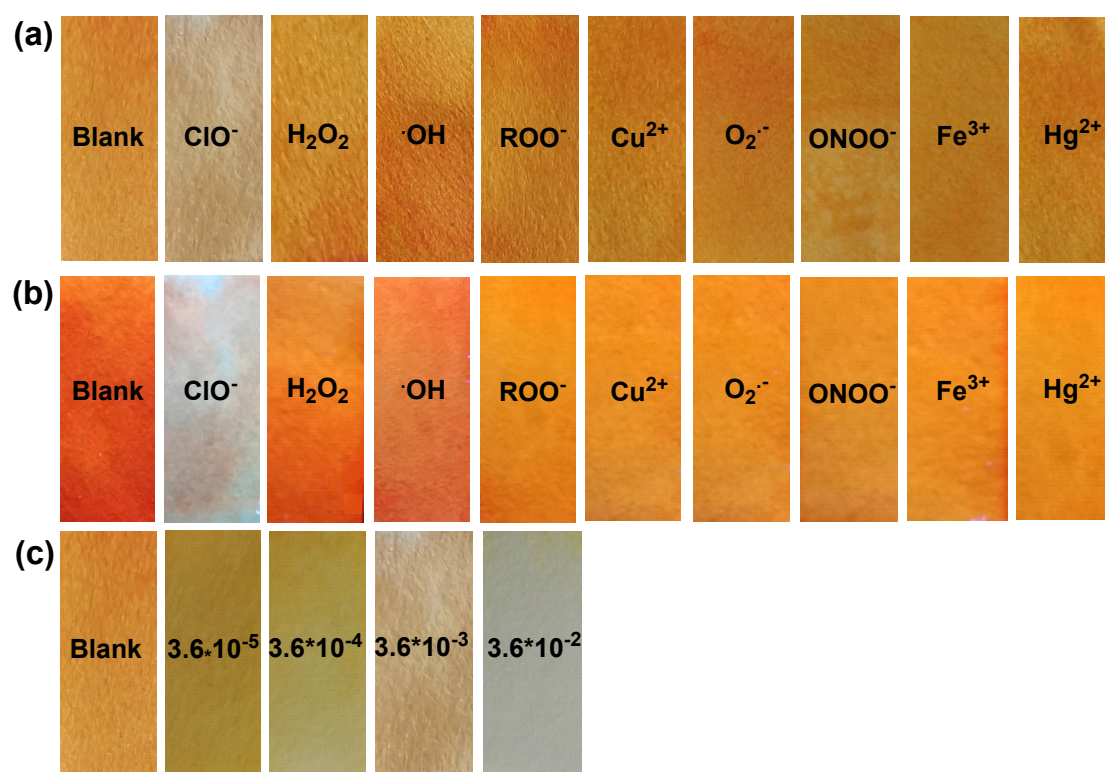

**Figure S9.** Photographs of the **Is-OL** based test strips colorimetric detect different ROS and metal ions: (a) Under sunlight, (b) with UV-lamp at 365 nm and (c) under different  $\text{ClO}^-$  concentration (from  $3.6 \times 10^{-5}$  M to  $3.6 \times 10^{-2}$  M) under sunlight.

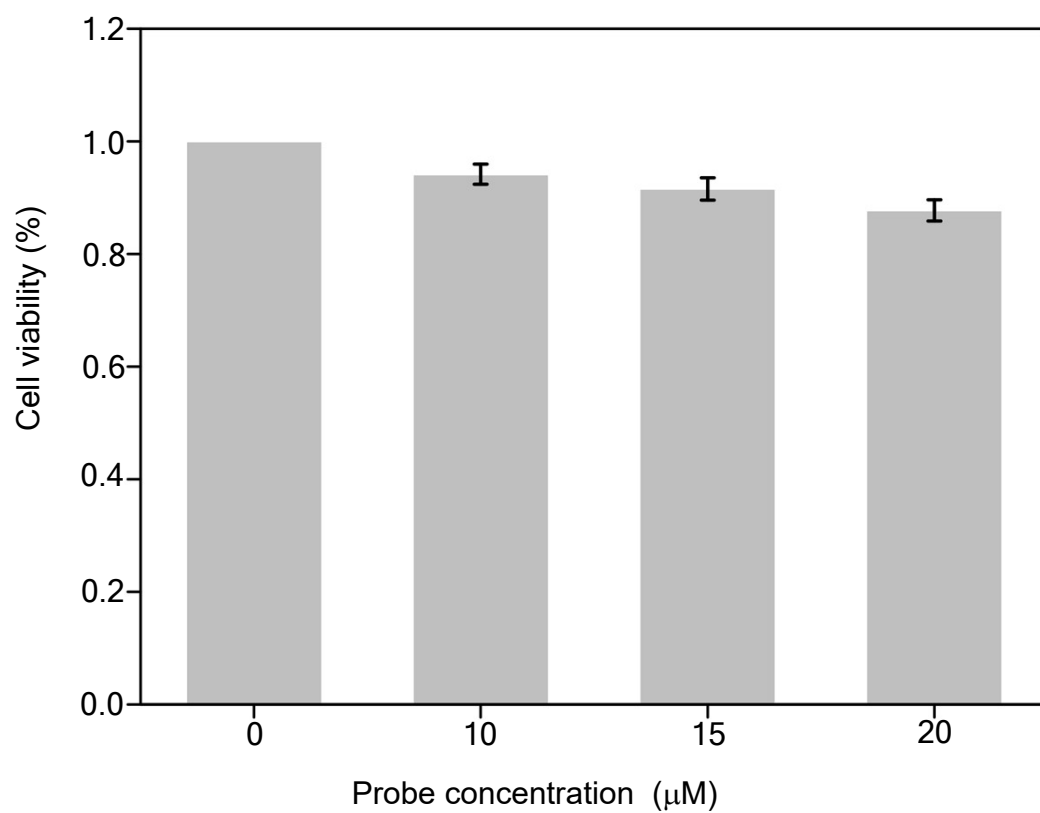

**Figure. S10.** Cell viability of HeLa cells incubated with different concentrations of chemosensor **Is-OL**.

## Reference

[S1] C. Lee, W. Yang, R.G. Parr, *Phys. Rev. B* 37 (1988) 785.

[S2] M.J. Frisch, G.W. Trucks, H.B. Schlegel, G.E. Scuseria, M.A. Robb, J.R. Cheeseman, G. Scalmani, V. Barone, B. Mennucci, G.A. Petersson, H. Nakatsuji, M. Caricato, X. Li, H.P. Hratchian, A.F. Izmaylov, J. Bloino, G. Zheng, J.L. Sonnenberg, M. Hada, M. Ehara, K. Toyota, R. Fukuda, J. Hasegawa, M. Ishida, T. Nakajima, Y. Honda, O. Kitao, H. Nakai, T. Vreven, J.A. Montgomery, Jr., J.E. Peralta, F. Ogliaro, M. Bearpark, J.J. Heyd, E. Brothers, K.N. Kudin, V.N. Staroverov, R. Kobayashi, J. Normand, K. Raghavachari, A. Rendell, J.C. Burant, S.S. Iyengar, J. Tomasi, M. Cossi, N. Rega, J.M. Millam, M. Klene, J.E. Knox, J.B. Cross, V. Bakken, C. Adamo, J. Jaramillo, R. Gomperts, R.E. Stratmann, O. Yazyev, A.J. Austin, R. Cammi, C. Pomelli, J.W. Ochterski, R.L. Martin, K. Morokuma, V.G. Zakrzewski, G.A. Voth, P. Salvador, J.J. Dannenberg, S. Dapprich, A.D. Daniels, O. Farkas, J.B. Foresman, J.V. Ortiz, J. Cioslowski, D.J. Fox, *Gaussian 09, Revision A.02*, Gaussian Inc, Wallingford CT (2009)
